# Supplementary material for: The three-hybrid genetic composition of an Ecuadorian population using AIMs-InDels compared with autosomes, mitochondrial DNA and Y chromosome data
Source: PubMed Central journal article supplement (PMC6592923; doi:10.1038/s41598-019-45723-w), 2019-06-25
Supplement: 41598_2019_45723_MOESM1_ESM.pdf [file 41598_2019_45723_MOESM1_ESM.pdf]

**The three-hybrid genetic composition of an Ecuadorian population using AIMs-InDels compared with autosomes, mitochondrial DNA and Y chromosome data.**

Ana Karina Zambrano<sup>1\*</sup>, Aníbal Gaviria<sup>2\*</sup>, Santiago Cobos<sup>2</sup>, Carmen Gruezo<sup>2</sup>, Cristina Rodríguez<sup>2</sup>, Isaac Armendáriz-Castillo<sup>1</sup>, Jennyfer García-Cárdenas<sup>1</sup>, Santiago Guerrero<sup>1</sup>, Andrés López-Cortés<sup>1</sup>, Paola E. Leone<sup>1</sup>, Andy Pérez-Villa<sup>1</sup>, Patricia Guevara-Ramírez<sup>1</sup>, Verónica Yumiceba<sup>1</sup>, Gisella Fiallos<sup>2</sup>, Margarita Vela<sup>2</sup>, César Paz-y-Miño<sup>1</sup>

<sup>1</sup>Centro de Investigación Genética y Genómica, Facultad de Ciencias de la Salud Eugenio Espejo, Universidad UTE, Av. Mariscal Sucre and Mariana de Jesús, Block I, Quito 170129, Ecuador.

<sup>2</sup>Laboratorio de Genética, Centros Médicos Especializados Cruz Roja Ecuatoriana, Papallacta oe1-66, Quito 170512, Ecuador.

\*Ana Karina Zambrano y Aníbal Gaviria contributed equally to the paper.

Corresponding author:

César Paz y Miño

Address: Centro de Investigación Genética y Genómica, Facultad de Ciencias de la Salud Eugenio Espejo, Universidad UTE, Av. Mariscal Sucre and Mariana de Jesús, Block I, Quito 170129, Ecuador.

Telephone: +593 99 502 6485

E-mail address: [cesar.pazymino@ute.edu.ec](mailto:cesar.pazymino@ute.edu.ec)

**Supplementary Figure S1.**- Multidimensional scaling plot from  $F_{ST}$  between Ecuadorian, Colombian<sup>36</sup> and Brazilian<sup>19 37</sup> populations. Data from Arlequin software and the plot were constructed using STATISTICA v13.

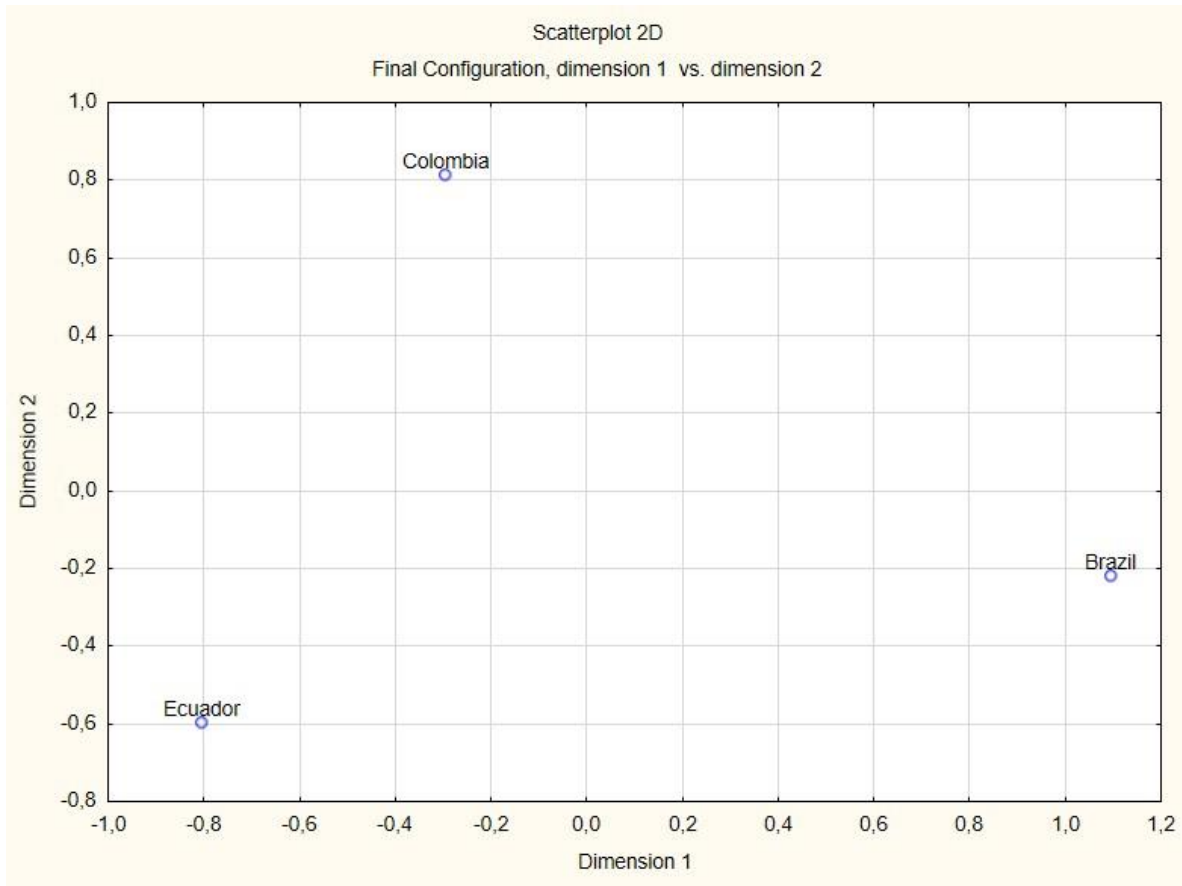

**Supplementary Table S1.-** Allele frequencies, allele frequency differentials ( $\delta$ ), and observed and expected heterozygosity values for the 46 AIM-InDels in the Ecuadorian population (ECU) joined and divided by region: Amazonia (AM), Highlands (HL), and Coast (CO) and comparison with HGDP-CEPH panel samples from Africa ((AFR), Europe (EUR) and Native America (NAM).

| MID      | Frequency of allele 1 |       |       |       | Frequency of allele 2 |       |       |       | Allele frequency differentials ( $\delta$ ) |          |          |       |       |       | Obs. Het (ECU) | Exp. Het (ECU) |
|----------|-----------------------|-------|-------|-------|-----------------------|-------|-------|-------|---------------------------------------------|----------|----------|-------|-------|-------|----------------|----------------|
|          | AM                    | HL    | CO    | ECU   | AM                    | HL    | CO    | ECU   | ECU/ AFR                                    | ECU/ EUR | ECU/ NAM | AM/HL | AM/CO | HL/CO |                |                |
| MID-1470 | 0.223                 | 0.119 | 0.157 | 0.158 | 0.777                 | 0.881 | 0.843 | 0.842 | 0.004                                       | 0.405    | 0.127    | 0.104 | 0.067 | 0.037 | 0.276          | 0.267          |
| MID-777  | 0.589                 | 0.523 | 0.571 | 0.558 | 0.411                 | 0.477 | 0.429 | 0.442 | 0.168                                       | 0.270    | 0.286    | 0.067 | 0.019 | 0.048 | 0.432          | 0.494          |
| MID-196  | 0.170                 | 0.165 | 0.258 | 0.204 | 0.830                 | 0.835 | 0.742 | 0.796 | 0.334                                       | 0.268    | 0.141    | 0.005 | 0.088 | 0.093 | 0.276          | 0.325          |
| MID-881  | 0.982                 | 0.915 | 0.848 | 0.903 | 0.018                 | 0.085 | 0.152 | 0.097 | 0.579                                       | 0.023    | 0.089    | 0.067 | 0.134 | 0.066 | 0.136          | 0.175          |
| MID-3122 | 0.973                 | 0.989 | 0.965 | 0.975 | 0.027                 | 0.011 | 0.035 | 0.025 | 0.423                                       | 0.016    | 0.025    | 0.015 | 0.009 | 0.024 | 0.041          | 0.048          |
| MID-548  | 0.152                 | 0.170 | 0.237 | 0.193 | 0.848                 | 0.830 | 0.763 | 0.807 | 0.145                                       | 0.003    | 0.021    | 0.019 | 0.086 | 0.067 | 0.288          | 0.313          |
| MID-659  | 0.268                 | 0.307 | 0.283 | 0.288 | 0.732                 | 0.693 | 0.717 | 0.712 | 0.012                                       | 0.184    | 0.030    | 0.039 | 0.015 | 0.024 | 0.379          | 0.411          |
| MID-2011 | 0.857                 | 0.881 | 0.798 | 0.842 | 0.143                 | 0.119 | 0.202 | 0.158 | 0.680                                       | 0.051    | 0.064    | 0.024 | 0.059 | 0.083 | 0.226          | 0.267          |
| MID-2929 | 0.893                 | 0.920 | 0.833 | 0.879 | 0.107                 | 0.080 | 0.167 | 0.121 | 0.089                                       | 0.224    | 0.098    | 0.028 | 0.060 | 0.087 | 0.210          | 0.214          |
| MID-593  | 0.027                 | 0.034 | 0.086 | 0.054 | 0.973                 | 0.966 | 0.914 | 0.947 | 0.642                                       | 0.048    | 0.046    | 0.007 | 0.059 | 0.052 | 0.058          | 0.101          |
| MID-798  | 0.286                 | 0.290 | 0.278 | 0.284 | 0.714                 | 0.710 | 0.722 | 0.716 | 0.011                                       | 0.358    | 0.167    | 0.004 | 0.008 | 0.012 | 0.412          | 0.407          |
| MID-1193 | 0.054                 | 0.119 | 0.126 | 0.107 | 0.946                 | 0.881 | 0.874 | 0.893 | 0.071                                       | 0.009    | 0.034    | 0.066 | 0.073 | 0.007 | 0.181          | 0.191          |
| MID-1871 | 0.366                 | 0.341 | 0.298 | 0.329 | 0.634                 | 0.659 | 0.702 | 0.671 | 0.248                                       | 0.003    | 0.040    | 0.025 | 0.068 | 0.043 | 0.403          | 0.443          |
| MID-17   | 0.839                 | 0.767 | 0.717 | 0.763 | 0.161                 | 0.233 | 0.283 | 0.237 | 0.032                                       | 0.425    | 0.135    | 0.072 | 0.122 | 0.050 | 0.325          | 0.362          |
| MID-2538 | 0.161                 | 0.170 | 0.232 | 0.193 | 0.839                 | 0.830 | 0.768 | 0.807 | 0.193                                       | 0.301    | 0.130    | 0.010 | 0.072 | 0.062 | 0.329          | 0.313          |
| MID-1644 | 0.473                 | 0.511 | 0.551 | 0.519 | 0.527                 | 0.489 | 0.449 | 0.481 | 0.290                                       | 0.434    | 0.324    | 0.038 | 0.077 | 0.039 | 0.469          | 0.500          |
| MID-3854 | 0.045                 | 0.040 | 0.177 | 0.097 | 0.955                 | 0.960 | 0.823 | 0.903 | 0.651                                       | 0.084    | 0.089    | 0.005 | 0.132 | 0.137 | 0.160          | 0.175          |
| MID-2275 | 0.277                 | 0.364 | 0.348 | 0.337 | 0.723                 | 0.636 | 0.652 | 0.663 | 0.149                                       | 0.242    | 0.186    | 0.087 | 0.072 | 0.015 | 0.436          | 0.448          |
| MID-94   | 0.536                 | 0.580 | 0.561 | 0.562 | 0.464                 | 0.420 | 0.439 | 0.438 | 0.491                                       | 0.407    | 0.086    | 0.044 | 0.025 | 0.019 | 0.481          | 0.493          |
| MID-3072 | 0.982                 | 0.972 | 0.864 | 0.930 | 0.018                 | 0.028 | 0.136 | 0.070 | 0.830                                       | 0.010    | 0.047    | 0.011 | 0.119 | 0.108 | 0.091          | 0.130          |
| MID-772  | 0.759                 | 0.778 | 0.823 | 0.792 | 0.241                 | 0.222 | 0.177 | 0.208 | 0.151                                       | 0.176    | 0.011    | 0.019 | 0.064 | 0.045 | 0.325          | 0.330          |

|           |       |       |       |       |       |       |       |       |       |       |       |       |       |       |       |       |
|-----------|-------|-------|-------|-------|-------|-------|-------|-------|-------|-------|-------|-------|-------|-------|-------|-------|
| MID-2313  | 0.750 | 0.682 | 0.556 | 0.646 | 0.250 | 0.318 | 0.444 | 0.354 | 0.536 | 0.399 | 0.084 | 0.068 | 0.194 | 0.126 | 0.428 | 0.458 |
| MID-397   | 0.429 | 0.443 | 0.495 | 0.461 | 0.571 | 0.557 | 0.505 | 0.539 | 0.310 | 0.305 | 0.117 | 0.015 | 0.066 | 0.052 | 0.551 | 0.498 |
| MID-1636  | 0.938 | 0.915 | 0.843 | 0.891 | 0.063 | 0.085 | 0.157 | 0.109 | 0.743 | 0.106 | 0.101 | 0.023 | 0.094 | 0.071 | 0.193 | 0.195 |
| MID-51    | 0.804 | 0.801 | 0.662 | 0.745 | 0.196 | 0.199 | 0.338 | 0.255 | 0.688 | 0.103 | 0.122 | 0.002 | 0.142 | 0.140 | 0.362 | 0.381 |
| MID-2431  | 0.277 | 0.250 | 0.136 | 0.210 | 0.723 | 0.750 | 0.864 | 0.790 | 0.158 | 0.099 | 0.024 | 0.027 | 0.140 | 0.114 | 0.296 | 0.332 |
| MID-2264* | 0.295 | 0.216 | 0.268 | 0.255 | 0.679 | 0.767 | 0.707 | 0.722 | 0.093 | 0.210 | 0.122 | 0.079 | 0.027 | 0.052 | 0.436 | 0.414 |
| MID-2256  | 0.518 | 0.642 | 0.510 | 0.560 | 0.482 | 0.358 | 0.490 | 0.440 | 0.560 | 0.338 | 0.276 | 0.124 | 0.008 | 0.132 | 0.527 | 0.494 |
| MID-128   | 0.196 | 0.261 | 0.268 | 0.249 | 0.804 | 0.739 | 0.732 | 0.751 | 0.225 | 0.232 | 0.202 | 0.065 | 0.071 | 0.006 | 0.399 | 0.375 |
| MID-15    | 0.563 | 0.585 | 0.616 | 0.593 | 0.438 | 0.415 | 0.384 | 0.407 | 0.398 | 0.140 | 0.243 | 0.023 | 0.054 | 0.031 | 0.428 | 0.484 |
| MID-2241  | 0.080 | 0.142 | 0.253 | 0.173 | 0.920 | 0.858 | 0.747 | 0.827 | 0.641 | 0.120 | 0.103 | 0.062 | 0.172 | 0.110 | 0.247 | 0.287 |
| MID-419   | 0.670 | 0.597 | 0.641 | 0.632 | 0.330 | 0.403 | 0.359 | 0.368 | 0.287 | 0.178 | 0.069 | 0.073 | 0.028 | 0.045 | 0.457 | 0.466 |
| MID-943   | 0.491 | 0.540 | 0.571 | 0.541 | 0.509 | 0.460 | 0.429 | 0.459 | 0.365 | 0.250 | 0.143 | 0.049 | 0.080 | 0.031 | 0.465 | 0.498 |
| MID-159   | 0.786 | 0.716 | 0.717 | 0.733 | 0.214 | 0.284 | 0.283 | 0.267 | 0.019 | 0.163 | 0.001 | 0.070 | 0.069 | 0.001 | 0.420 | 0.393 |
| MID-2005  | 0.375 | 0.375 | 0.379 | 0.377 | 0.625 | 0.625 | 0.621 | 0.623 | 0.348 | 0.294 | 0.052 | 0.000 | 0.004 | 0.004 | 0.457 | 0.470 |
| MID-250   | 0.536 | 0.494 | 0.601 | 0.547 | 0.464 | 0.506 | 0.399 | 0.453 | 0.277 | 0.168 | 0.136 | 0.041 | 0.065 | 0.107 | 0.502 | 0.497 |
| MID-1802  | 0.054 | 0.045 | 0.091 | 0.062 | 0.946 | 0.955 | 0.909 | 0.938 | 0.481 | 0.059 | 0.062 | 0.009 | 0.037 | 0.046 | 0.124 | 0.117 |
| MID-1607  | 0.473 | 0.392 | 0.379 | 0.405 | 0.527 | 0.608 | 0.621 | 0.595 | 0.019 | 0.244 | 0.150 | 0.081 | 0.094 | 0.013 | 0.432 | 0.483 |
| MID-1734  | 0.589 | 0.625 | 0.606 | 0.609 | 0.411 | 0.375 | 0.394 | 0.391 | 0.243 | 0.226 | 0.234 | 0.036 | 0.017 | 0.019 | 0.453 | 0.477 |
| MID-406   | 0.643 | 0.688 | 0.621 | 0.650 | 0.357 | 0.313 | 0.379 | 0.350 | 0.602 | 0.173 | 0.053 | 0.045 | 0.022 | 0.066 | 0.469 | 0.456 |
| MID-1386  | 0.545 | 0.466 | 0.399 | 0.457 | 0.455 | 0.534 | 0.601 | 0.543 | 0.319 | 0.239 | 0.309 | 0.079 | 0.146 | 0.067 | 0.461 | 0.497 |
| MID-1726  | 0.634 | 0.665 | 0.636 | 0.646 | 0.366 | 0.335 | 0.364 | 0.354 | 0.470 | 0.054 | 0.112 | 0.031 | 0.002 | 0.028 | 0.461 | 0.458 |
| MID-3626  | 0.205 | 0.216 | 0.222 | 0.216 | 0.795 | 0.784 | 0.778 | 0.784 | 0.092 | 0.483 | 0.177 | 0.011 | 0.017 | 0.006 | 0.276 | 0.339 |
| MID-360*  | 0.723 | 0.722 | 0.667 | 0.700 | 0.268 | 0.273 | 0.323 | 0.292 | 0.109 | 0.164 | 0.177 | 0.002 | 0.057 | 0.055 | 0.444 | 0.426 |
| MID-1603  | 0.670 | 0.540 | 0.561 | 0.578 | 0.330 | 0.460 | 0.439 | 0.422 | 0.497 | 0.189 | 0.242 | 0.130 | 0.109 | 0.021 | 0.498 | 0.489 |
| MID-2719  | 0.598 | 0.420 | 0.485 | 0.488 | 0.402 | 0.580 | 0.515 | 0.512 | 0.040 | 0.143 | 0.019 | 0.178 | 0.113 | 0.064 | 0.490 | 0.501 |

\*Markers that present an allele 3: Frequency=1-(frequency allele 1 + frequency allele2)
